# Supplementary material for: Discovering Distinct Functional Modules of Specific Cancer Types Using Protein-Protein Interaction Networks
Source: Hindawi journal article supplement (doi:10.1155/2015/146365), 2015-01-01
Supplement: f1 [file 146365.f1.zip]

## **SUPPLEMENTARY DATA**

Supplementary data files can be accessed from the following URLs

<http://genome.unmc.edu/ru/SupplementaryFile1.docx>

<http://genome.unmc.edu/ru/SupplementaryFile2.xlsx>
