# Supplementary material for: Discovering Distinct Functional Modules of Specific Cancer Types Using Protein-Protein Interaction Networks
Source: Biomed Res Int. 2015 Sep 30;2015:146365. doi: 10.1155/2015/146365 (PMC4606133; doi:10.1155/2015/146365)
Supplement: Supplementary file 1 — contains more details on the existing graph clustering algorithms and supplementary figures. Supplementary File 2 contains the edge-overlapping rates for all the distinct subgraphs in the six IPA networks. [file 146365.f1.zip]

Archive with 6 entries (5 files):
- SUPPLEMENTARY DATA.pdf
- Supplementary File 1 doc.doc
- Supplementary File 2.xlsx
- __MACOSX/
- __MACOSX/._Supplementary File 1 doc.doc
- __MACOSX/._Supplementary File 2.xlsx
