# Supplementary material for: Discovering Distinct Functional Modules of Specific Cancer Types Using Protein-Protein Interaction Networks
Source: Biomed Res Int. 2015 Sep 30;2015:146365. doi: 10.1155/2015/146365 (PMC4606133; doi:10.1155/2015/146365)
Supplement: Supplementary file 1 — contains more details on the existing graph clustering algorithms and supplementary figures. Supplementary File 2 contains the edge-overlapping rates for all the distinct subgraphs in the six IPA networks. [file 146365.f1.zip › Supplementary File 2.xlsx]

## Sheet: p-value
		Six IPA Networks
		Breast	Cervical	Colorectal	Melanoma	Pancreatic	Prostate
Nine PPI Networks	Bladder	2.25e-05	0.00522784	0.000225493	2.11e-06	0.0959522	8.47e-08
	Breast		0.00296867	1.94e-05	1.93e-07	0.301795	7.93e-07
	Cervical	3.42e-07		0.00786972	9.2e-08	0.346288	5.67e-08
	Colorectal	1.72e-05	0.00286604		2.59e-07	0.0669977	6.14e-07
	Esophagus	3.44e-05	0.00313841	4.76e-11	1.07e-05	0.0480647	4.9e-05
	Gastric	1.19e-05	0.00286604	2.36e-06	1.96e-07	0.0480647	1.74e-06
	Melanoma	1.59e-05	0.00381441	1.08e-06		0.0480647	1.34e-07
	Pancreatic	5.39e-07	0.00286604	3.65e-05	1.49e-07		5.3e-07
	Prostate	2.02e-05	0.00303564	5.08e-08	1.42e-07	0.0922404

## Sheet: BreOverlappingRate
Bladder	Breast	Cervical	Colorectal	Esophagus	Gastric	Melanoma	Pancreatic	Prostate
0	0.0819672	0	0	0.25	0	0	0	0
0	0	0	0	0	0	0	0	0
0	0.0588235	0	0	0	0	0	0	0
0	0	0	0	0	0	0	0	0
0	0	0	0	0	0	0	0	0
0.0952381	0.0833333	0	0	0	0	0	0	0
0	0.0588235	0	0	0	0	0	0	0
0	0	0	0	0	0.0555556	0	0	0
0	0	0	0	0	0	0	0	0
0	0	0	0	0	0	0	0	0
0	0.2	0	0	0	0	0	0	0
0	0	0	0	0	0	0	0	0
0	0.666667	0	0	0	0	0	0	0
0	0	0	0	0	0	0	0	0
0	0	0	0	0	0	0	0	0
0	0.25	0	0	0	0	0	0	0
0	0	0	0	0	0	0	0	0
0	0	0	0	0	0	0	0	0
0.666667	0.181818	0	0	0	0	0	0	0
0	0.2	0	0	0	0	0	0	0.333333
0.111111	0.47619	0	0	0	0	0	0	0
0	0	0	0.4	0	0	0	0.0625	0
0	0.375	0	0	0	0	0	0	0
0	0	0	0	0	0	0	0	0
0	0	0	0	0	0	0	0	0
0	0	0	0	0	0	0	0	0
0	0	0	0	0	0	0	0	0
0	0.4	0	0	0	0.2	0	0	0
0	0.2	0	0	0	0	0	0	0
0	0	0.0555556	0		0	0	0	0
0	0	0.1	0		0	0	0	0
0	0	0	0		0	0	0	0
0	0	0	0		0	0	0	0
0	0	0	0.25		0	0	0	0
0	0.363636	0	0		0	0	0	0
0	0	0	0		0	0	0	0
0	0	0	0		0	0	0	0.333333
0	0	0	0		0	0	0	0
0	0.2	0	0		0	0	0	0
0	0	0	0		0	0	0	0
0	0	0	0		0	0	0	0
0	0	0	0		0	0	0	0
0	1	0	0		0.2	0	0	0.233333
0	0.1125	0	0		0	0	0	0
0	0	0	0		0	0	0	0
0	0	0	0		0	0	0	0
0	0.111111		0		0	0	0	0
0	0		0		0	0.0909091	0	0
0	0		0		0	0	0	0
0	0		0		0	0	0	0
0	0.714286		0		0	0	0	0
0	0		0		0	0	0	0
0	0.0555556		0		0	0	0	0
0	0.0588235		0		0	0	0	0
0	0.857143		0		0	0	0	0
0	0.0486111		0		0	0	0	0
0	0		0		0	0	0	0
0	0.444444		0		0	0	0	0
0	0		0		0	0.0645161	0	0
0	0		0		0	0	0	0
0	0		0		0	0	0	0
0	0		0		0	0	0	0
0	0		0		0	0	0	0
0	0		0		0	0	0	0
0	0		0		0.125	0	0	0
0	0		0		0	0	0	0.0909091
0	0		0		0	0	0	0
0	0.269231		0		0	0	0	0
0	0		0		0	0	0	0
0	0.153846		0		0.2	0	0	0
0	0		0		0	0	0	0.0357143
0	0.136364		0		0	0	0	0
0	0		0		0	0	0	0
0	0		0		0	0	0	0
0	0		0		0	0	0	0
0.0188679	0		0		0	0	0	0
0	0		0		0	0	0	0
0	0		0		0	0	0	0
0	0		0		0	0	0	0
0	0		0		0	0	0	0
0	0		0		0	0	0	0
0	0		0		0	0	0	0
0	0		0		0	0	0	0
0	0		0		0	0.666667	0	0
0	0		0		0	0	0	0
0.4	0.0434783		0		0	0	0	0
0	0		0		0	0	0	0
0	0		0		0	0	0.0666667	0
0	0		0.2		0	0	0	0
0	0		0		0	0	0	0
0	0		0		0.2	0	0	0
0	0.2		0		0	0	0	0
0	0		0		0	0.142857	0	0
0	0		0		0	0	0.111111	0
0	0		0		0	0	0	0
0	0		0		0	0	0	0
0	0		0		0	0	0	0
0	0		0		0	0	0	0
0	0		0		0	0	0	0.25
0.0652174	0.333333		0		0.125		0	0
0	0		0		0		0	0
0	0		0		0		0	0
0	0.833333		0		0		0	0
0	0.333333		0		0		0	0
0	0.2		0		0		0	0
0	0.166667		0		0		0	0
0	0		0		0		0	0
0	0.166667		0		0.125		0	0
0	0.212121		0.0666667		0		0	0
0	0		0		0.25		0	0
0	0		0		0		0	0
0	0.0454545		0		0		0	0.25
0	0		0		0		0	0
0	0		0		0		0.0714286	0
0	0		0		0		0	0
0.0588235	0.0681818		0		0		0.0833333	0
0	0		0				0	0
0	0		0				0	0
0	0		0				0	0
0.333333	0		0				0	0
0.1	0		0.0555556				0	0
0	0		0				0	0.28
0	0		0				0	0
0	0		0				0	0
0	0		0				0	0
0	0		0				0	0
0.037037	0		0				0	0
0	0		0				0	0
0	0		0				0	0
0	0.210526		0				0	0
0	0		0				0	0
0	0		0				0	0
0	0		0				0	0
0	0.142857		0				0
0	0		0				0
0	0.222222		0				0
0	0		0				0
0	0		0				0
0	0		0				0
0	0		0				0
0	0		0.222222				0
0	0		0				0
0	0		0				0
0	0.333333		0				0
0	0		0				0
0	0		0				0
0	0		0				0.333333
0	0.666667		0				0
0	0		0				0
0.0769231	0		0				0
0	0		0				0
0	0.0833333		0				0
0	0		0				0
0	0		0
	0		0
	0.4		0
	0		0
	0.166667		0
	0		0
	0		0
	0		0
			0
			0
			0
			0
			0
			0
			0
			0
			0
			0
			0
			0
			0
			0.0434783
			0
			0
			0.181818
			0
			0
			0
			0
			0
			0
			0
			0
			0
			0
			0
			0
			0
			0
			0
			0
			0
			0
			0
			0
			0
			0
			0
			0
			0
			0
			0
			0
			0
			0
			0
			0
			0
			0
			0.428571
			0
			0
			0.25
			0
			0
			0
			0
			0
			0
			0
			0
			0
			0
			0
			0
			0
			0
			0
			0
			0
			0
			1
			0
			0
			0
			0.1
			0
			0.407407
			0
			0
			0
			0
			0
			0
			0
			0
			0
			0
			0
			0
			0.0909091
			0.0731707
			0
			0
			0
			0
			0
			0
			0
			0
			0
			0.2
			0
			0
			0
			0
			0
			0
			0
			0
			0
			0
			0
			0
			0
			0
			0
			0
			0
			0
			0
			0
			0
			0
			0
			0

## Sheet: CerOverlappingRate
Bladder	Breast	Cervical	Colorectal	Esophagus	Gastric	Melanoma	Pancreatic	Prostate
0	0.0327869	0	0	0	0	0	0	0
0	0	0	0	0	0	0	0	0
0	0	0	0	0	0	0	0	0
0	0	0	0	0	0	0	0	0
0	0	0	0	0	0	0	0	0
0	0	0	0	0	0	0	0	0
0	0	0	0	0	0	0	0	0
0	0	0	0	0	0	0	0	0
0	0	0	0	0	0	0	0	0
0	0	0	0	0	0	0	0	0
0	0	0	0	0	0	0	0	0
0	0	0.666667	0	0	0	0	0	0
0	0	0	0	0	0	0	0	0
0	0	0	0	0	0	0	0	0
0	0	0	0	0	0	0	0	0
0	0	0	0	0	0	0	0	0
0	0	0.333333	0	0	0	0	0	0
0	0	0.4	0	0	0	0	0	0
0	0	0	0	0	0	0	0	0
0	0	0.333333	0	0	0	0	0	0
0	0	0	0	0	0	0	0	0
0	0	0	0.1	0	0	0	0	0
0	0	0	0	0	0	0	0	0
0	0	0	0	0	0	0	0	0
0	0	0.333333	0	0	0	0	0	0
0.333333	0	0	0	0	0	0	0	0
0	0	0	0	0	0	0	0	0
0	0	0	0	0	0	0	0	0
0	0	0	0	0	0	0	0	0
0	0	0.111111	0		0	0	0	0
0	0	0.1	0		0	0	0	0
0	0	0	0		0	0	0	0
0	0	0	0		0	0	0	0
0	0	0	0		0	0	0	0
0	0	0	0		0	0	0	0
0	0	0.333333	0		0	0	0	0
0	0	0	0		0	0	0	0
0	0	0	0		0	0	0	0
0	0	0	0		0	0	0	0
0	0	0.428571	0		0	0	0	0
0	0	0	0		0	0	0	0
0	0	0	0		0	0	0	0
0	0	0	0		0	0	0	0
0	0	0	0		0	0	0	0
0	0	0.333333	0		0	0	0	0
0	0	0	0		0	0	0	0
0	0		0		0	0	0	0
0	0		0		0	0	0	0
0	0		0		0	0	0	0
0	0		0		0	0	0	0
0	0		0		0	0	0	0
0	0		0		0	0	0	0
0	0		0		0	0	0	0
0	0		0		0	0	0	0
0	0		0		0	0	0	0
0	0.0138889		0		0	0	0	0
0	0		0		0	0	0	0
0	0		0		0	0	0	0
0	0		0		0	0	0	0
0	0		0		0	0	0	0
0	0		0		0	0	0	0
0	0		0		0	0	0	0
0	0		0		0	0	0	0
0	0		0		0	0	0	0
0	0		0		0	0	0	0
0	0		0		0	0	0	0
0	0		0		0	0	0	0
0	0		0		0	0	0	0
0	0		0		0	0	0	0
0	0		0		0	0	0	0
0	0		0		0	0	0	0
0	0		0		0	0	0	0
0	0		0		0	0	0	0
0	0		0		0	0	0	0
0	0		0		0	0	0	0
0	0		0		0	0	0	0
0	0		0		0	0	0	0
0	0		0		0	0	0	0
0	0		0		0	0	0	0
0	0		0		0	0	0	0
0	0		0		0	0	0	0
0	0		0		0	0	0	0
0	0		0		0	0	0	0
0	0		0		0	0	0	0
0	0		0		0	0	0	0
0	0		0		0	0	0	0
0	0		0		0	0	0	0
0	0		0		0	0	0	0
0	0		0		0	0	0	0
0	0		0		0	0	0	0
0	0		0		0	0	0	0
0	0		0		0	0	0	0
0	0		0		0	0	0	0
0	0		0		0	0	0	0
0	0		0		0	0	0	0
0	0		0		0	0	0	0
0	0		0		0.25	0	0	0
0	0		0		0	0	0	0
0	0		0		0	0	0	0
0.0434783	0		0		0		0	0
0	0		0		0		0	0
0	0		0		0		0	0
0	0		0		0		0	0
0	0		0		0		0	0
0	0		0		0		0	0
0.333333	0		0		0		0	0
0	0		0		0		0	0
0	0		0		0		0	0
0	0		0		0		0	0
0	0		0		0		0	0
0	0		0		0		0	0
0	0		0		0		0	0
0	0		0		0		0	0
0	0		0		0		0.0714286	0
0	0		0		0		0	0
0	0		0		0		0	0
0	0		0				0	0
0	0		0				0	0
0	0		0				0	0
0	0		0				0	0
0	0		0				0	0
0	0		0				0	0
0	0		0				0	0
0	0		0.0666667				0	0
0	0		0				0	0
0	0		0				0	0
0	0		0				0	0
0	0		0				0	0
0	0		0				0	0
0	0		0				0	0
0	0		0				0	0
0	0		0				0	0
0	0		0				0	0
0	0		0				0
0	0		0				0
0	0		0				0
0	0		0				0
0	0		0				0
0	0		0				0
0	0		0				0
0	0		0				0
0	0		0				0
0	0		0				0
0	0		0				0
0	0		0				0
0	0		0				0
0	0		0				0
0	0		0				0
0	0		0				0
0	0		0				0
0	0		0				0
0	0		0				0
0	0		0				0
0	0		0
	0		0
	0		0
	0		0
	0		0
	0		0
	0		0
	0		0
			0
			0
			0
			0
			0
			0
			0
			0
			0
			0
			0
			0
			0
			0
			0
			0
			0
			0
			0
			0
			0
			0
			0
			0
			0
			0
			0
			0
			0
			0
			0
			0
			0
			0
			0
			0
			0
			0
			0
			0
			0
			0
			0
			0
			0
			0
			0
			0
			0
			0
			0
			0
			0
			0
			0
			0
			0
			0
			0
			0
			0
			0
			0
			0
			0
			0
			0
			0
			0
			0
			0
			0
			0
			0
			0
			0
			0
			0
			0
			0
			0
			0
			0
			0
			0
			0
			0
			0
			0
			0
			0
			0
			0
			0.0487805
			0
			0
			0
			0
			0
			0
			0
			0
			0
			0
			0
			0
			0
			0
			0
			0
			0
			0
			0
			0
			0
			0
			0
			0
			0
			0
			0
			0
			0
			0
			0
			0
			0
			0

## Sheet: ConOverlappingRate
Bladder	Breast	Cervical	Colorectal	Esophagus	Gastric	Melanoma	Pancreatic	Prostate
0	0.0983607	0	0.666667	0	0	0	0	0
0	0	0	0	0	0	0	0	0
0	0.0588235	0	0	0	0	0	0	0
0.25	0	0	0	0	0	0	0	0
0	0	0	0	0	0	0	0	0
0	0.166667	0	0	0	0	0	0	0
0	0	0	0	0	0	0	0	0
0	0	0	0.142857	0	0.0555556	0	0	0
0	0	0	0	0	0	0	0.2	0
0	0	0	0	0	0	0	0	0
0	0	0	0	0	0	0	0	0
0	0	0	0.5	0	0	0	0	0
0	0.333333	0	0	0	0	0.333333	0	0
0	0	0	0	0	0	0	0	0
0	0	0	0	0	0	0	0	0
0	0	0	0.2	0	0	0	0	0
0	0	0.333333	0	0	0	0	0	0
0	0	0	0	0	0	0	0	0
0	0	0	0	0	0	0	0	0
0	0	0	0	0	0	0	0	0
0	0.047619	0	0	0	0	0	0	0
0	0	0.157895	0.7	0	0	0	0	0
0.2	0.25	0	0	0	0	0.25	0	0
0	0	0	0	0	0	0	0.903226	0
0	0	0	0.258824	0	0.0666667	0	0	0
0	0	0	0	0	0	0	0	0
0	0	0	0.333333	0	0.2	0	0	0
0	0.2	0	0	0	0	0	0	0
0	0	0	0	0	0	0	0	0
0	0	0	0		0	0	0	0
0	0	0.05	0		0	0	0.25	0
0	0	0	0		0	0	0	0
0	0	0	0.166667		0	0	0	0
0	0	0	0.5		0	0	0	0
0	0	0	0		0	0	0	0
0	0	0.333333	0		0	0	0	0
0.849057	0	0	0.25		0	0	0	0
0	0	0	0		0	0	0	0
0	0.2	0	0		0	0	0.0909091	0
0	0	0	0		0	0	0	0
0	0	0	0		0	0	0	0
0	0	0	0		0	0	0.333333	0
0	0	0	1		0	0	0	0.233333
0.454545	0	0	0.0188679		0	0	0	0
0	0	0.333333	0		0	0	0	0
0	0	0	0		0	0	0	0
0	0		0		0	0	0	0
0	0		0		0	0.0909091	0	0
0.461538	0.0909091		0		0.285714	0	0	0
0	0		0		0	0	0.125	0
0	0.571429		0		0	0	0	0
0	0		0		0	0	0	0
0.166667	0		0		0	0	0	0.192308
0	0		0.125		0	0	0	0
0	0		0		0	0	0	0
0	0		0		0	0	0	0
0	0		0		0	0	0	0
0	0		0.111111		0	0.142857	0	0
0	0		0		0	0.129032	0	0
0	0		0		0	0	0	0
0	0		0		0	0	0	0.0769231
0	0		0.0540541		0	0	0	0
0	0		0		0	0	0	0
0	0		0		0	0	0	0.111111
0	0		0		0	0	0	0
0	0		0		0	0	0	0
0	0		0.142857		0.0576923	0	0	0
0	0		0		0	0	0	0
0	0		0		0	0	0	0
0	0		0		0	0	0	0
0	0		0		0	0	0.102041	0
0	0		0		0	0	0	0
0	0		0		0	0	0	0
0	0		0		0	0	0	0
0	0		0		0	0	0	0
0.0188679	0		0		0	0	0	0
0	0		0.5		0.647059	0	0.0833333	0
0	0		0		0	0	0	0
0	0		0		0	0	0	0
0	0		0.333333		0	0	0	0
0	0		0		0	0	0	0
0	0		0		0	0	0	0
0	0		0		0	0	0	0
0	0		0		0	0	0	0
0.0777778	0		0.145161		0	0	0	0
0.2	0		0		0	0	0	0
0	0		0.25		0	0	0	0
0.333333	0		0		0	0	0	0
0	0		0.2		0	0.296296	0	0
0	0		0		0	0	0	0
0	0		0		0	0	0	0
0	0		0		0	0	0	0
0	0		0		0	0	0	0
0	0		0		0	0	0	0
0	0		0		0	0	0	0
0	0		0.166667		0	0	0	0
0	0		0		0	0	0	0
0	0		0		0	0	0.166667	0
0	0		0		0	0	0	0
0.0434783	0		0		0		0	0
0	0		0		0		0	0
0	0.25		0		0		0	0
0	0		0		0		0	0.214286
0	0.333333		0		0		0	0
0	0		0		0		0	0
0	0.333333		0		0		0	0
0	0		0		0		0	0
0	0		0.285714		0		0	0
0	0		0.166667		0		0.0877193	0
0	0		0.0833333		0		0	0
0	0		0.285714		0		0.0263158	0
0	0		0		0		0	0.125
0	0		0		0		0	0
0	0		0		0.1125		0.0714286	0
0	0		0.142857		0		0	0
0	0		0		0		0.166667	0
0	0		0				0	0
0	0		0.2				0	0
0	0		0.25				0	0.2
0.0555556	0		0				0	0
0	0		0.166667				0.214286	0
0	0		0				0	0
0	0		0				0	0
0	0		0.133333				0	0
0	0		0				0	0
0	0		0				0	0
0	0		0				0	0
0	0		0				0	0
0	0		0				0	0
0	0.0526316		0.35				0	0.142857
0	0		0				0	0
0	0		0.25				0	0
0.25	0		0				0	0
0	0		0				0
0	0		0				0
0	0		0				0
0	0		0				0
0	0		0				0
0	0		0				0
0	0		0				0
0	0		0.185185				0
0	0		0				0
0	0		0				0
0	0		0				0
0	0		0.666667				0
0	0		0.857143				0
0	0		0				0
0	0		0				0
0	0		0.2				0
0.0769231	0.111111		0				0
0	0		0				0
0	0		0				0
0	0		0				0
0	0		0
	0		0
	0		0
	0		0
	0		0
	0		0
	0		0
	0		0
			0
			1
			0
			0
			0
			0
			0
			0
			0
			0
			0
			0
			0
			0
			0
			0
			0
			0.333333
			0
			0
			0.666667
			0
			0
			0
			0
			0
			0
			0
			0.333333
			0
			0
			0
			0.25
			0
			0
			0
			0
			0.111111
			0
			0
			0
			0
			0
			0.0555556
			0
			0
			0
			0
			0
			0
			0
			0
			0
			0.125
			0
			0
			0
			0
			0
			0.25
			0.5
			0
			0
			0
			0
			0
			0
			0.163265
			0
			0.4
			0
			0
			0.2
			1
			0.0666667
			0
			0
			0.1
			0
			0.407407
			0
			0.333333
			0
			0.5
			0
			0
			0
			0
			0
			0
			0
			0.333333
			0.181818
			0.0487805
			0
			0
			0.5
			0
			0
			0
			0
			0
			0
			0
			0
			0.2
			0
			0
			0
			0
			0
			0.115385
			0
			0
			0.0454545
			0
			0
			0
			0
			0
			0
			0
			0
			0
			0
			0.130435
			0.0909091
			0.866667

## Sheet: MelaOverlappingRate
Bladder	Breast	Cervical	Colorectal	Esophagus	Gastric	Melanoma	Pancreatic	Prostate
0	0	0	0	0	0	0.333333	0	0
0	0	0	0	0	0	0	0	0
0	0	0	0	0	0	0	0	0
0	0	0	0	0	0	0.333333	0	0
0	0	0	0	0	0	0.25	0	0
0	0	0	0	0	0	0.25	0	0
0	0	0	0	0	0	0.6	0	0
0	0	0	0	0	0	0.333333	0	0
0	0	0	0	0	0	0	0	0
0	0	0	0	0	0	0	0	0
0	0	0	0	0	0	0	0	0
0	0	0	0	0	0	0.111111	0	0
0	0	0	0	0.210526	0	0.666667	0	0
0	0	0	0	0.2	0	0	0	0
0.333333	0	0	0	0	0	0	0	0
0	0	0	0	0	0	0.5	0	0
0	0	0	0	0	0	0	0	0
0	0	0	0	0	0	0	0	0
0	0	0	0	0	0	0	0	0
0	0	0	0	0	0	0	0	0
0	0	0	0	0	0	0	0	0
0	0	0	0	0	0	0	0	0
0	0	0	0	0	0	0.5	0	0
0	0	0	0	0	0	0	0	0
0	0	0	0	0	0	0.333333	0	0
0	0	0	0	0	0	0.5	0	0
0	0	0	0	0	0.1	0	0	0
0	0	0	0	0	0	0.333333	0	0
0	0	0	0	0	0	0	0	0
0	0	0	0		0	0	0	0
0	0	0	0		0	0.333333	0	0
0	0	0	0		0	0	0	0
0	0	0	0		0	0	0	0
0	0	0	0.25		0	0	0	0
0	0	0	0		0	0	0	0
0	0	0	0		0	0	0	0
0	0	0	0		0	0	0	0
0	0	0	0		0	0	0	0
0	0.2	0	0		0	0.666667	0	0
0	0	0	0		0	0	0	0
0	0	0	0		0	0	0	0
0	0	0	0		0	0	0	0
0	0	0	0		0	0	0	0
0	0	0	0		0	0	0	0
0	0	0	0		0	0.333333	0	0
0	0	0	0		0	0	0	0
0	0		0		0	0	0	0
0	0		0		0	0.363636	0	0
0.0769231	0		0		0	0	0	0
0.03	0		0		0	0	0	0
0	0		0		0	0	0	0
0	0		0		0	0	0	0
0	0		0		0	0	0	0
0	0		0		0	0	0	0
0	0		0		0	0	0	0
0	0		0		0	0	0	0
0	0		0		0	0	0	0
0	0		0		0	0.142857	0	0
0	0		0		0	0	0	0
0	0		0		0	0.333333	0	0
0	0		0		0	0	0	0.230769
0	0		0		0	0.272727	0	0
0	0		0		0	0	0	0
0	0		0		0	0	0	0
0	0		0		0	0	0	0
0	0		0		0	0	0	0
0	0		0		0	0.333333	0	0
0.666667	0		0		0	0	0	0
0	0		0		0	0	0	0
0	0		0		0	0	0	0
0	0		0		0	0	0	0
0	0.0454545		0		0	0	0	0
0	0		0		0	0	0	0
0	0		0		0	0	0	0
0	0		0		0	0.4	0	0
0	0		0		0	0	0	0
0	0		0		0	0.4	0.0625	0
0	0		0		0	0.25	0	0
0	0		0		0	0	0	0
0	0		0		0	0	0	0
0	0		0		0	0	0	0
0	0		0		0	0	0	0
0	0		0		0	0.666667	0	0
0	0		0		0	0	0	0
0.0333333	0		0.0645161		0	0	0	0
0	0		0		0	0	0	0
0	0		0		0	0	0	0
0	0		0		0	0.166667	0	0
0	0		0		0	0.185185	0	0
0	0		0		0	0	0	0
0	0		0		0	0	0	0
0	0		0		0	1	0	0
0.333333	0		0		0	0.285714	0	0
0	0		0		0	0.25	0	0
0.25	0		0		0	0	0	0
0	0		0		0	0	0	0
0	0		0		0	0	0	0
0	0		0		0	0.333333	0	0
0	0		0		0	0	0	0
0	0		0		0		0	0
0	0		0		0		0	0
0	0.25		0		0		0	0
0	0		0		0		0	0
0	0		0		0		0	0
0	0		0		0		0	0
0	0		0		0		0.2	0
0	0		0		0		0	0
0	0		0		0.25		0	0
0	0		0		0		0	0
0	0		0		0		0	0
0	0		0		0		0	0
0	0		0		0		0	0
0	0		0		0		0	0
0	0		0		0		0	0
0	0		0		0		0	0
0	0		0		0		0	0
0	0		0				0	0
0	0		0				0	0
0	0		0				0	0
0	0		0				0	0
0	0		0				0	0
0	0		0				0	0
0	0		0				0	0
0	0		0				0	0
0	0		0				0	0
0	0		0				0	0
0	0		0				0	0
0	0		0				0	0
0	0		0				0	0
0	0		0				0	0
0	0		0				0	0
0.142857	0		0				0	0
0	0		0				0	0
0	0		0				0
0	0		0				0
0	0		0				0
0	0		0				0
0	0		0				0
0	0		0				0.0526316
0	0		0				0
0	0		0				0
0	0		0				0
0	0		0				0
0	0		0				0
0	0		0.666667				0
0	0		0				0
0	0		0				0
0	0		0				0
0	0		0				0
0	0		0				0
0	0		0				0
0	0		0				0
0	0		0				0
0	0		0
	0		0
	0		0
	0		0
	0		0
	0		0
	0		0
	0		0
			0
			0
			0
			0
			0
			0
			0
			0
			0
			0
			0
			0
			0
			0
			0
			0
			0
			0
			0
			0
			0
			0
			0
			0
			0
			0
			0
			0
			0
			0
			0
			0
			0
			0
			0
			0
			0
			0
			0
			0
			0
			0
			0
			0
			0
			0
			0
			0
			0
			0
			0
			0
			0
			0
			0
			0
			0
			0
			0
			0
			0
			0
			0
			0
			0
			0
			0
			0
			0
			0.0666667
			0
			0
			0
			0
			0
			0
			0
			0
			0
			0
			0
			0
			0
			0
			0
			0
			0
			0
			0
			0
			0
			0
			0
			0
			0
			0
			0.0384615
			0
			0
			0.142857
			0
			0
			0
			0
			0
			0
			0
			0
			0
			0
			0
			0
			0
			0
			0
			0
			0
			0
			0
			0
			0
			0
			0
			0
			0
			0
			0
			0

## Sheet: PanOverlappingRate
Bladder	Breast	Cervical	Colorectal	Esophagus	Gastric	Melanoma	Pancreatic	Prostate
0	0.0491803	0	0	0	0	0	0	0
0	0	0	0	0	0	0	0	0
0	0	0	0	0	0	0	0	0
0	0	0	0	0	0	0	0	0
0	0	0	0	0	0	0	0	0
0	0	0	0	0	0	0	0	0
0	0	0	0	0	0	0	0	0
0	0	0	0	0	0	0	0	0
0	0	0	0	0	0	0	0	0
0	0	0	0	0	0	0	0	0
0	0	0	0	0	0	0	0	0
0	0	0	0	0	0	0	0	0
0	0	0	0	0	0	0	0	0
0	0	0	0	0	0	0	0	0
0	0	0	0	0	0	0	0	0
0	0	0	0	0	0	0	0	0
0	0	0	0	0	0	0	0	0
0	0	0	0	0	0	0	0	0
0	0	0	0	0	0	0	0	0
0	0.2	0	0	0	0	0	0	0
0	0.047619	0	0	0	0	0	0	0
0	0	0	0	0	0	0	0.0625	0
0	0	0	0	0	0	0	0	0
0	0	0	0	0	0	0	0	0
0	0	0	0	0	0	0	0	0
0	0	0	0	0	0	0	0	0
0	0	0	0	0	0	0	0	0
0	0	0	0	0	0	0	0	0
0	0	0	0	0	0	0	0	0
0	0	0	0		0	0	0	0
0	0	0.1	0		0	0	0	0
0	0	0	0		0	0	0	0
0	0	0	0		0	0	0	0
0	0	0	0		0	0	0	0
0	0	0	0		0	0	0	0
0	0	0	0		0	0	0	0
0	0	0	0		0	0	0	0
0	0	0	0		0	0	0	0
0	0	0	0		0	0	0	0
0	0	0	0		0	0	0	0
0	0	0	0		0	0	0	0
0	0	0	0		0	0	0	0
0	0	0	0		0	0	0	0
0	0	0	0		0	0	0	0
0	0	0	0		0	0	0	0
0	0	0	0		0	0	0	0
0	0		0		0	0	0	0
0	0		0		0	0	0	0
0	0		0		0	0	0	0
0	0		0		0	0	0	0
0	0		0		0	0	0	0
0	0		0		0	0	0	0
0	0		0		0	0	0	0
0	0		0		0	0	0	0
0	0		0		0	0	0	0
0	0		0		0	0	0	0
0	0		0		0	0	0	0
0	0		0		0	0	0	0
0	0		0		0	0	0	0
0	0		0		0	0	0	0
0	0		0		0	0	0	0
0	0		0		0	0	0	0
0	0		0		0	0	0	0
0	0		0		0	0	0	0
0	0		0		0	0	0	0
0	0		0		0	0	0	0.0909091
0	0		0		0	0	0	0
0	0		0		0	0	0	0
0	0		0		0	0	0	0
0	0		0		0	0	0	0
0	0		0		0	0	0	0
0	0		0		0	0	0	0
0	0		0		0	0	0	0
0	0		0		0	0	0	0
0	0		0		0	0	0	0
0	0		0		0	0	0	0
0	0		0		0	0	0	0
0	0		0		0	0	0	0
0	0		0		0	0	0	0
0	0		0		0	0	0	0
0	0		0		0	0	0	0
0	0		0		0	0	0	0
0	0		0		0	0	0	0
0	0		0		0	0	0	0
0	0		0		0	0	0	0
0	0		0		0	0	0	0
0	0		0		0	0	0	0
0	0		0		0	0	0.0666667	0
0	0		0		0	0	0	0
0	0		0		0	0	0	0
0	0		0		0	0	0	0
0	0		0		0	0	0	0
0	0		0		0	0	0	0
0	0		0		0	0	0.222222	0
0	0		0		0	0	0	0
0	0		0		0	0	0	0
0	0		0		0	0	0	0
0	0		0		0	0	0	0
0	0		0		0	0	0	0
0.0652174	0		0		0		0	0
0	0		0		0		0	0
0	0		0		0		0	0
0	0		0		0		0	0
0	0.030303		0		0		0	0
0	0		0		0		0	0
0	0		0		0		0	0
0	0		0		0		0	0
0	0		0		0		0	0
0	0		0		0		0	0
0	0		0		0		0	0
0	0		0		0		0	0
0	0.0454545		0		0		0	0
0	0		0		0		0	0
0	0		0		0		0.0714286	0
0	0		0		0		0	0
0	0		0		0		0.0833333	0
0	0		0				0	0
0	0		0				0	0
0	0		0				0	0
0.0555556	0		0				0	0
0	0		0				0	0
0	0		0				0	0
0	0		0				0	0
0	0		0				0	0
0	0		0				0	0
0	0		0				0	0
0	0		0				0	0
0	0		0				0	0
0	0		0				0	0
0	0		0				0	0
0	0		0				0	0
0	0		0				0	0
0	0		0				0	0
0	0		0				0
0	0		0				0
0	0		0				0
0	0		0				0
0	0		0				0
0	0		0				0
0	0		0				0
0	0		0				0
0	0		0				0
0	0		0				0
0	0		0				0
0	0		0				0
0	0		0				0
0	0		0				0.333333
0	0		0				0
0	0		0				0
0	0		0				0
0	0		0				0
0	0		0				0
0	0		0				0
0	0		0
	0		0
	0		0
	0		0
	0		0
	0		0
	0		0
	0		0
			0
			0
			0
			0
			0
			0
			0
			0
			0
			0
			0
			0
			0
			0
			0
			0
			0
			0
			0
			0
			0
			0
			0
			0
			0
			0
			0
			0
			0
			0
			0
			0
			0
			0
			0
			0
			0
			0
			0
			0
			0
			0
			0
			0
			0
			0
			0
			0
			0
			0
			0
			0
			0
			0
			0
			0
			0
			0
			0
			0
			0
			0
			0
			0
			0
			0
			0
			0
			0
			0
			0
			0
			0
			0
			0
			0
			0
			0
			0
			0.037037
			0
			0
			0
			0
			0
			0
			0
			0
			0
			0
			0
			0
			0
			0.0731707
			0
			0
			0
			0
			0
			0
			0
			0
			0
			0
			0
			0
			0
			0
			0
			0
			0
			0
			0
			0
			0
			0
			0
			0
			0
			0
			0
			0
			0
			0
			0
			0
			0
			0

## Sheet: ProOverlappingRate
Bladder	Breast	Cervical	Colorectal	Esophagus	Gastric	Melanoma	Pancreatic	Prostate
0	0.0327869	0	0	0	0	0	0	0
0	0	0	0	0	0	0	0	0
0	0	0	0	0	0	0	0	0
0	0	0	0	0	0	0	0	0
0	0	0	0	0	0	0	0	0
0	0	0	0	0	0	0	0	0.375
0	0	0	0	0	0	0	0	0
0	0	0	0	0	0	0	0	0
0	0	0	0	0	0	0	0	0.333333
0	0	0	0	0	0	0	0	0
0	0	0	0	0	0	0	0	0
0	0	0	0	0	0	0	0	0
0	0	0	0	0	0	0	0	0
0	0	0	0.5	0	0	0	0	0
0	0	0	0	0	0	0	0	0
0	0	0	0	0	0	0	0	0
0	0	0	0	0	0	0	0	0.75
0	0	0	0	0	0	0	0	0
0	0	0	0	0	0	0	0	0
0	0	0	0	0	0	0	0	0
0	0	0	0	0	0.333333	0	0	0
0	0	0	0	0.333333	0	0	0	0
0	0.25	0	0	0	0	0	0	0
0	0	0	0	0	0	0	0	0
0	0	0	0.152941	0	0	0	0	0.2
0	0	0	0	0	0	0	0	0
0	0	0	0	0	0	0	0	0.166667
0	0	0	0	0	0.2	0	0	0
0	0	0	0	0	0	0	0	0
0	0.333333	0	0		0	0	0	0
0	0	0.05	0		0	0	0	0
0	0	0	0		0	0	0	0
0	0	0	0		0	0	0	0
0	0	0	0		0	0	0	0
0	0.181818	0	0		0	0	0	0
0	0	0	0		0	0	0	0
0	0	0	0		0	0	0	0
0	0	0	0		0	0	0	0
0	0	0	0		0	0	0	0
0	0	0	0		0	0	0	0
0	0	0	0		0	0	0	0
0	0	0	0		0	0	0	0.333333
0	0	0	0		0.2	0	0	0.166667
0	0	0	0		0	0	0	0
0	0	0	0		0	0	0	0.6
0	0	0	0		0	0	0	0
0	0		0		0	0	0	0
0	0		0		0	0	0	0
0	0		0		0	0	0	0
0	0		0		0	0	0	0
0	0		0		0	0	0	0
0	0		0		0	0	0	0
0	0.111111		0		0	0	0	0.211538
0	0		0		0	0	0	0
0	0		0		0	0	0	0
0	0		0		0	0	0	0
0	0		0		0	0	0	0
0	0		0		0	0	0	0
0	0		0		0	0	0	0.4
0	0		0		0	0	0	0
0	0		0		0	0	0	0.0769231
0	0		0		0	0	0	0
0	0		0		0	0.3	0	0
0	0		0		0	0	0	0.111111
0	0		0		0	0	0	0.25
0	0		0		0	0	0	0
0	0		0		0	0	0	0
0	0		0		0	0	0	0.8
0	0		0		0	0	0	0
0	0		0		0	0	0	0
0	0		0		0	0	0.102041	0.214286
0	0		0		0	0	0	0
0	0		0		0	0	0	0.25
0	0		0		0	0	0	0
0	0		0		0	0	0	0
0.113208	0		0		0	0	0	0
0	0		0		0	0	0.0208333	0
0	0		0		0	0	0	0
0	0		0		0.4	0	0	0
0	0		0		0	0	0	0
0	0		0		0	0	0	0
0	0		0		0	0	0	0.230769
0	0		0		0	0	0	0
0	0		0		0	0	0	0.666667
0.0111111	0		0.016129		0	0	0	0
0	0		0		0	0	0	0
0	0		0		0	0	0	0
0	0		0		0	0	0.0666667	0.333333
0	0		0		0	0	0	0
0	0		0		0	0	0	0
0	0		0		0	0	0	0
0	0		0		0	0	0	0
0	0		0		0	0	0	0.4
0	0		0		0	0	0	0
0	0		0		0	0	0	0.375
0	0		0		0	0	0	0
0	0		0		0	0	0	0
0	0		0		0	0	0	0
0	0		0		0	0	0	0.25
0.0217391	0		0.0625		0		0	0
0	0		0		0		0	0
0	0.0833333		0		0		0	0
0	0		0		0		0	0.214286
0	0		0		0		0	0.75
0	0.2		0		0		0	0
0	0		0		0		0	0.0606061
0	0		0		0		0	0
0	0		0.428571		0		0	0.333333
0	0.151515		0		0		0	0
0	0		0		0		0	0
0	0		0		0		0.0789474	0
0	0		0		0		0	0.5
0	0		0		0		0	0
0	0		0		0.0625		0	0
0	0		0		0		0	0.375
0	0.0227273		0		0		0	0
0	0		0				0	0
0	0		0				0	0
0	0		0				0	0.8
0	0		0				0	0
0	0		0				0.0714286	0
0	0		0				0	0.24
0	0		0				0	0.25
0	0		0				0.428571	0
0	0		0				0	0.125
0	0		0				0	0.4
0.148148	0		0				0	0.333333
0	0		0				0	0
0	0		0				0	0
0	0		0				0	0.285714
0	0		0				0	0.5
0	0		0				0	0
0	0		0				0	0
0	0		0				0
0	0		0				0
0	0.111111		0				0
0	0		0				0.352941
0	0		0				0
0	0		0				0
0	0		0				0
0	0		0.148148				0
0	0		0				0
0	0		0				0
0	0		0				0
0	0		0				0
0	0		0				0
0	0		0				0
0	0		0				0
0	0		0				0
0.0769231	0		0.142857				0
0	0		0				0
0	0		0				0
0	0		0				0
0	0		0
	0		0
	0		0
	0		0
	0		0
	0		0
	0		0
	0		0.25
			0
			0
			0
			0
			0
			0
			0
			0
			0
			0
			0
			0
			0
			0
			0
			0
			0
			0
			0
			0
			0
			0
			0
			0
			0
			0
			0
			0
			0
			0
			0
			0
			0.25
			0
			0
			0
			0
			0.111111
			0
			0
			0
			0
			0
			0
			0
			0.333333
			0
			0
			0
			0
			0
			0
			0
			0
			0
			0
			0
			0
			0
			0
			0.05
			0
			0
			0
			0
			0
			0
			0
			0
			0
			0
			0
			0
			0
			0
			0
			0
			0
			0
			0
			0
			0
			0
			0
			0
			0
			0
			0
			0
			0
			0
			0
			0
			0.0243902
			0
			0
			0
			0
			0
			0
			0
			0
			0
			0
			0
			0
			0
			0
			0
			0
			0
			0
			0
			0
			0
			0
			0
			0
			0
			0
			0
			0
			0
			0
			0
			0
			0
			0

## Sheet: Cancer-specific PPI modules
Breast cancer			Cervical cancer			Colorectal cancer			Melanoma			Pancreatic cancer			Prostate cancer
CDK8	SREBF1		ATR	CHEK1		CASP10	TNFRSF10A		APP	SPON1		DLG1	KCNJ4		ATM	TERF1
CCNC	CDK8		CDC25B	CHEK1		CASP10	FADD		APBB2	APP		ATP2B2	DLG1		TERF1	TERF1
MED1	SREBF1					CASP10	TNFSF10		APLP2	SPON1		DLG1	KIF1B		ATM	OBFC2B
						FADD	TNFRSF10A		APBB2	APLP2
						TNFRSF10A	TNFSF10
						TNFRSF10A	TNFRSF10B
						TNFRSF10A	TNFRSF10D
						FADD	TNFSF10
						FADD	TNFRSF10B
						TNFRSF10B	TNFSF10
						TNFRSF10D	TNFSF10
						TNFRSF10B	TNFRSF10D
